# Supplementary material for: Ankyrin-3 as a molecular marker of early-life stress and vulnerability to psychiatric disorders
Source: PubMed Central journal article supplement (PMC5314123; doi:10.1038/tp.2016.211), 2016-11-08
Supplement: tp2016211x2.pdf [file tp2016211x2.pdf]

**Supplementary Table 1**  
**Phenotypic characteristics of mothers and infants**

**Supplementary Table 1a: Summary of the phenotypic assessment of mothers and infants at two time points early in life**

|                                              | <b>Prenatal / 3<sup>rd</sup> Trimester</b>                                                                                                                                                                                                                                                                                         | <b>Perinatal / birth</b>                                                                                                                                                                |
|----------------------------------------------|------------------------------------------------------------------------------------------------------------------------------------------------------------------------------------------------------------------------------------------------------------------------------------------------------------------------------------|-----------------------------------------------------------------------------------------------------------------------------------------------------------------------------------------|
| <b>Exposure to early life stress (ELS)</b>   | Perceived stress (PSS <sup>1</sup> )<br>Prenatal distress (PDQ <sup>2</sup> )<br>Life events (LES <sup>3</sup> )<br>Social support (Soz-U. <sup>4</sup> )<br>Socio-demographic data<br>Maternal health risk behavior (e.g. smoking)<br>Psychosocial risks                                                                          | Pre- and perinatal complications<br>Perinatal stressors (e.g. asphyxia, caesarian, preterm birth)<br>Pregnancy & obstetric history (birth weight, gestational age, birth complications) |
| <b>Maternal mental &amp; physical health</b> | Maternity log data<br>semi- standardized neuropsychiatric diagnostic interview (M.I.N.I. <sup>5</sup> )<br>Depression screening (EPDS <sup>6</sup> )<br>Anxiety screening (STAI-S <sup>7</sup> , STAI-T <sup>7</sup> , ASQ <sup>8</sup> )<br>Anthropometry<br>Individual & family history of metabolic and other medical disorders |                                                                                                                                                                                         |

1, perceived stress scale; 2, prenatal distress questionnaire; 3, life experiences survey; 4, social support questionnaire; 5, Mini-international neuropsychiatric interview; 6, Edinburgh postnatal depression scale; 7, state- trait anxiety inventory; 8, anxiety screening questionnaire

**Supplementary Table 1**  
**Phenotypic characteristics of mothers and infants**

**Supplementary Table 1b: Summary of the information about psychopathology, socioeconomic-, psychosocial- and perceived stress of the extreme group of mothers expressed as mean  $\pm$  SD1 or percentage**

| Variable                                                          | High prenatal ELS (n=10) | Low prenatal ELS (n=8) | p value         |
|-------------------------------------------------------------------|--------------------------|------------------------|-----------------|
| <b>Maternal psychopathology</b>                                   |                          |                        |                 |
| EPDS Score <sup>3</sup>                                           | 15.40 $\pm$ 4.95         | 2.13 $\pm$ 1.25        | 0               |
| STAI-S Score <sup>3</sup>                                         | 52.60 $\pm$ 13.32        | 32.62 $\pm$ 4.81       | 0.001           |
| STAI-T Score <sup>3</sup>                                         | 50.90 $\pm$ 10.50        | 28.75 $\pm$ 4.53       | 0               |
| ASQ Score <sup>3</sup>                                            | 5.40 $\pm$ 1.84          | 0.25 $\pm$ 0.46        | 0               |
| <b>M.I.N.I. Diagnosis<sup>4</sup></b>                             |                          |                        |                 |
| none                                                              | 20%                      | 100%                   | 0               |
| depressive disorders                                              | 50%                      | 0%                     | 0.015           |
| anxiety disorder                                                  | 10%                      | 0%                     | ns <sup>2</sup> |
| <b>Current psychiatric disorder<sup>4</sup> (%)</b>               |                          |                        |                 |
| none                                                              | 30%                      | 100%                   | 0.001           |
| depressive disorder                                               | 50%                      | 0%                     | 0.015           |
| anxiety disorder                                                  | 10%                      | 0%                     | ns <sup>2</sup> |
| <b>Perceived stress</b>                                           |                          |                        |                 |
| PSS Score <sup>3</sup>                                            | 32.70 $\pm$ 6.93         | 15.25 $\pm$ 3.92       | 0               |
| PDQ Score <sup>3</sup>                                            | 23.70 $\pm$ 8.06         | 8.63 $\pm$ 4.37        | 0               |
| <b>Socioeconomic and psychosocial stress</b>                      |                          |                        |                 |
| LES-negative events Score <sup>3</sup>                            | 8.50 $\pm$ 6.98          | 1.63 $\pm$ 1.06        | 0.013           |
| Soz-U Score <sup>3</sup>                                          | 37.80 $\pm$ 10.68        | 48.00 $\pm$ 6.78       | 0.026           |
| Living without a partner <sup>4</sup> (%)                         | 40%                      | 0%                     | 0.037           |
| Encouragement (Partner) <sup>4</sup> (%)                          | 70%                      | 100%                   | ns <sup>2</sup> |
| Separation(s) in the last year <sup>4</sup>                       | 50%                      | 0%                     | 0.015           |
| Daily arguments <sup>4</sup>                                      | 20%                      | 0%                     | ns <sup>2</sup> |
| Physical conflicts within the preceding 12 months <sup>4</sup>    | 60%                      | 0%                     | 0.005           |
| Composition of household<br>>one person /room <sup>4</sup>        | 30%                      | 0%                     | 0.037           |
| No graduation <sup>4</sup> (%)                                    | 20%                      | 0%                     | ns <sup>2</sup> |
| No professional education <sup>4</sup> (%)                        | 40%                      | 0%                     | 0.037           |
| Monthly income per household<br>$\leq$ 1750 Euro <sup>4</sup> (%) | 70%                      | 0%                     | 0.001           |
| Financial debt <sup>4</sup> (%)                                   | 50%                      | 0%                     | 0.015           |

1, standard deviation; 2, not significant; 3, the first eight main variables of the principal component analysis (PCA);

4, the twelve prenatal stressors which generate the adversity score as the ninth main variable of the PCA

**Supplementary Table 1**

**Phenotypic characteristics of mothers and infants**

**Supplementary Table 1c: Summary of the demographic characteristics and general medical status of mothers and infants included in the methylome analysis expressed as mean  $\pm$  SD or percentage**

| Variable                                                                                             | High prenatal ELS (n = 10) | Low prenatal ELS (n = 8) | p value         |
|------------------------------------------------------------------------------------------------------|----------------------------|--------------------------|-----------------|
| Maternal Age (in years)                                                                              | 24.10 $\pm$ 5.43           | 34.00 $\pm$ 3.30         | 0.000           |
| Smoking during early pregnancy<br>(4 <sup>th</sup> to 12 <sup>th</sup> wpma <sup>1</sup> ; %)        | 70%                        | 12.50%                   | 0.013           |
| Cigarettes in total (4 <sup>th</sup> to 12 <sup>th</sup> wpma <sup>1</sup> )                         | 297.70 $\pm$ 412.68        | 3.00 $\pm$ 8.50          | 0.050           |
| Range of cigarettes smoked                                                                           | 0-1092                     | 0-24                     |                 |
| Smoking during late pregnancy<br>(3 <sup>rd</sup> trimester, %)                                      | 40%                        | 0%                       | 0.037           |
| Cigarettes per day (3 <sup>rd</sup> trimester)                                                       | 3.30 $\pm$ 6.31            | 0                        | ns <sup>4</sup> |
| Range of cigarettes smoked                                                                           | 0-17                       | 0                        |                 |
| Alcohol intake during early pregnancy<br>(4 <sup>th</sup> to 12 <sup>th</sup> wpma <sup>1</sup> ; %) | 30%                        | 75%                      | ns <sup>4</sup> |
| Total alcohol intake<br>(4 <sup>th</sup> to 12 <sup>th</sup> wpma <sup>1</sup> in g <sup>5</sup> )   | 75.50 $\pm$ 187.18         | 23.50 $\pm$ 22.62        | ns <sup>4</sup> |
| Alcohol during late pregnancy<br>(3 <sup>rd</sup> trimester; %)                                      | 0%                         | 0%                       | ns <sup>4</sup> |
| Primiparous                                                                                          | 30%                        | 37.50%                   | ns <sup>4</sup> |
| Number of risk factors in the maternity log                                                          | 4.60 $\pm$ 2.38            | 3.17 $\pm$ 1.51          | ns <sup>4</sup> |
| Pre-Pregnancy BMI <sup>2</sup>                                                                       | 25.53 $\pm$ 7.08           | 21.69 $\pm$ 4.57         | ns <sup>4</sup> |
| Gestational diabetes (%)                                                                             | 20%                        | 0%                       | ns <sup>4</sup> |
| Gestational age at birth (wpma <sup>1</sup> )                                                        | 38.70 $\pm$ 2.00           | 39.63 $\pm$ 1.60         | ns <sup>4</sup> |
| Infant's Gender (%), male                                                                            | 50%                        | 37.50%                   | ns <sup>4</sup> |

1, weeks postmenstrual age; 2, body mass index; 3, standard deviation; 4, not significant; 5, gram

**Supplementary Table 2**

**Sequences of primers used for enrichment analyses of methylated DNA and for quantitative PCR (QPCR) validation of MeDIP data.**

| Human            |                              |                              |
|------------------|------------------------------|------------------------------|
| Gene             | Forward                      | Reverse                      |
| <i>H19</i>       | 5'-GAGCCGCACCAGATCTTCAG-3'   | 5'-TTGGTGGAACACACTGTGATCA-3' |
| <i>β-actin</i>   | 5'-CCAACGCCAAAACCTCTCCC-3'   | 5'-AGCCATAAAAGGCAACTTTCG-3'  |
| Monkey           |                              |                              |
| Gene             | Forward                      | Reverse                      |
| <i>H19</i>       | 5'-TTGGTGGAACACGCTGTGATCA-3' | 5'-GAGCCGCACCAGGTCTTCAG-3'   |
| <i>Gapdh</i>     | 5'-TTTCTTTCCTTTCGCGCTCTG-3'  | 5'-CCATTCATTTCTTCCCGTT-3'    |
| Rat              |                              |                              |
| Gene             | Forward                      | Reverse                      |
| <i>H19</i>       | 5'-CCAAGACAGAAGGGGACCAT-3'   | 5'-TAGATTTGGGGTTCGCCTGT-3'   |
| <i>β-actin</i>   | 5'-TGGGATAGTGTCCACAAGGG-3'   | 5'-GAAGAGTTTGGCGATGGGTG-3'   |
| <i>Ankyrin-3</i> | 5'-CAGGGGCTGTATTCTAGCAACT-3' | 5'-CCCCTCCGTCTCACACTATTTT-3' |

*H19* = methylated control; *β-actin*, *Gapdh* = un-methylated control

**Supplementary Table 3**  
**Characteristics of the Braincloud sample.**

| Sample Size | Female (Male) | Age         | RIN       | PMI         | pH        |
|-------------|---------------|-------------|-----------|-------------|-----------|
| 268         | 92 (176)      | 27.9 ± 22.2 | 8.4 ± 0.9 | 26.4 ± 17.1 | 6.5 ± 0.3 |

All the data are expressed as mean ± SD

**Supplementary Table 4**

**Characteristics of the samples used for the human behavioral and fMRI WM studies.**

|                                      | <b>Behavior</b> | <b>fMRI</b> |
|--------------------------------------|-----------------|-------------|
| <b>N</b>                             | 306             | 174         |
| <b>Gender (M/F)</b>                  | 138/168         | 81/93       |
| <b>Age</b>                           | 26.0±6.2        | 26.9±6.4    |
| <b>Handedness</b>                    | 0.7±0.4         | 0.7±0.5     |
| <b>Parental socioeconomic status</b> | 39.9±16.5       | 40.9±16.4   |
| <b>IQ</b>                            | 107.4±11.6      | 109.8±11.8  |

**Supplementary Table 5**

**Top diseases and biological functions associated with differentially methylated genes in the rat prefrontal cortex at PND62 after prenatal exposure to stress.**

| <b>Diseases and Disorders</b>                        | <b><i>p</i> value</b> |
|------------------------------------------------------|-----------------------|
| Neurological Disease                                 | 4.22E-09              |
| Organismal Injury and Abnormalities                  | 3.46E-08              |
| Cardiovascular Disease                               | 2.67E-07              |
| Hereditary Disorder                                  | 4.71E-07              |
| Psychological Disorders                              | 4.71E-07              |
| <b>Molecular and Cellular Functions</b>              | <b><i>p</i> value</b> |
| Molecular Transport                                  | 2.56E-08              |
| Cell Cycle                                           | 8.28E-08              |
| Cell-To-Cell Signaling and Interaction               | 4.30E-07              |
| Cellular Development                                 | 2.82E-06              |
| Cellular Growth and Proliferation                    | 5.01E-06              |
| <b>Physiological System Development and Function</b> | <b><i>p</i> value</b> |
| Nervous System Development and Function              | 2.56E-10              |
| Organ Morphology                                     | 1.72E-05              |
| Embryonic Development                                | 2.40E-05              |
| Organ Development                                    | 2.40E-05              |
| Organismal Development                               | 2.40E-05              |

**Supplementary Table 6**

List of probes showing differential methylation in the eight genes resulting from the overlap of different paradigms of early life stress exposure in different species and tissues.

| Gene name | Higher methylation in | Rat PFC (postnatal day 62)                                                                                                                                                                                                                                                                   |          | Monkey PFC (7 years old)                                                                                                                                                         |         | Monkey CD3+ (day 30 old)                                                                                                                                                                                                                                                                                                |         | Monkey CD3+ (2 years old)                                                                                                                                                             |         | Human CD34+ (cord blood)                                                                                                                                                                                                                                                                                                                                                                                                                                                                                                                                                                                                         |         |
|-----------|-----------------------|----------------------------------------------------------------------------------------------------------------------------------------------------------------------------------------------------------------------------------------------------------------------------------------------|----------|----------------------------------------------------------------------------------------------------------------------------------------------------------------------------------|---------|-------------------------------------------------------------------------------------------------------------------------------------------------------------------------------------------------------------------------------------------------------------------------------------------------------------------------|---------|---------------------------------------------------------------------------------------------------------------------------------------------------------------------------------------|---------|----------------------------------------------------------------------------------------------------------------------------------------------------------------------------------------------------------------------------------------------------------------------------------------------------------------------------------------------------------------------------------------------------------------------------------------------------------------------------------------------------------------------------------------------------------------------------------------------------------------------------------|---------|
|           |                       | diff meth probe                                                                                                                                                                                                                                                                              | q value  | diff meth probe                                                                                                                                                                  | q value | diff meth probe                                                                                                                                                                                                                                                                                                         | q value | diff meth probe                                                                                                                                                                       | q value | diff meth probe                                                                                                                                                                                                                                                                                                                                                                                                                                                                                                                                                                                                                  | q value |
| Ank3      | Stress                | chr20:19580638-19580697                                                                                                                                                                                                                                                                      | 0.141959 | chr9:76713019-76713067 0.143384<br>chr9:76713128-76713178 0.143384<br>chr9:76713244-76713294 0.143384<br>chr9:76713473-76713532 0.143384                                         |         | chr9:76897059-76897118 0.015381<br>chr9:76897099-76897158 0.015381<br>chr9:76897139-76897198 0.015381<br>chr9:76897179-76897238 0.015381<br>chr9:76897299-76897358 0.015381<br>chr9:76897379-76897438 0.032022<br>chr9:77144454-77144513 0.015059<br>chr9:77144854-77144913 0.015059<br>chr9:77144934-77144993 0.015059 |         | chr9:76897219-76897278 0.100842<br>chr9:76897299-76897358 0.100842<br>chr9:76899099-76899158 0.017648<br>chr9:76899139-76899198 0.017648                                              |         | chr10:61900618-61900677 0.060659<br>chr10:61901941-61902000 0.185321                                                                                                                                                                                                                                                                                                                                                                                                                                                                                                                                                             |         |
|           | Control               | chr20:19420344-19420403 0.114085<br>chr20:19420705-19420764 0.114085                                                                                                                                                                                                                         |          | X                                                                                                                                                                                |         | X                                                                                                                                                                                                                                                                                                                       |         | X                                                                                                                                                                                     |         | chr10:62149544-62149598 0.146104<br>chr10:62149595-62149639 0.146104                                                                                                                                                                                                                                                                                                                                                                                                                                                                                                                                                             |         |
| Cnga4     | Stress                | chr1:163137594-163137649 0.000065<br>chr1:163137327-163137372 0.000065                                                                                                                                                                                                                       |          | chr14:65936603-65936662 0.086013<br>chr14:65936702-65936758 0.086013<br>chr14:65936991-65937039 0.086013<br>chr14:65968017-65968072 0.191803<br>chr14:65968116-65968172 0.191803 |         | X                                                                                                                                                                                                                                                                                                                       |         | X                                                                                                                                                                                     |         | chr11:6256207-6256251 0.022758<br>chr11:6256284-6256328 0.022758                                                                                                                                                                                                                                                                                                                                                                                                                                                                                                                                                                 |         |
|           | Control               | X                                                                                                                                                                                                                                                                                            |          | X                                                                                                                                                                                |         | X                                                                                                                                                                                                                                                                                                                       |         | X                                                                                                                                                                                     |         | chr14:65967196-65967255 0.000299<br>chr14:65967276-65967335 0.000299<br>chr14:65967476-65967535 0.000054<br>chr14:65967516-65967575 0.000054<br>chr14:65967556-65967615 0.000054<br>chr14:65967596-65967655 0.000054<br>chr14:65967676-65967735 0.000054<br>chr14:65967716-65967775 0.000054<br>chr14:65967916-65967975 0.000054<br>chr14:65967956-65968015 0.000054<br>chr14:65968036-65968095 0.000054<br>chr14:65968076-65968135 0.000054<br>chr14:65967116-65967175 0.018034<br>chr14:65967316-65967375 0.018034<br>chr14:65967396-65967455 0.018034<br>chr14:65967476-65967535 0.018034<br>chr14:65967516-65967575 0.018034 |         |
| Dars2     | Stress                | chr13:76629115-76629165 0.005713                                                                                                                                                                                                                                                             |          | X                                                                                                                                                                                |         | X                                                                                                                                                                                                                                                                                                                       |         | X                                                                                                                                                                                     |         | X                                                                                                                                                                                                                                                                                                                                                                                                                                                                                                                                                                                                                                |         |
|           | Control               | X                                                                                                                                                                                                                                                                                            |          | chr1:203460771-203460815 0.135128<br>chr1:203460900-203460956 0.135128<br>chr1:203460981-203461036 0.135128                                                                      |         | chr1:203460535-203460594 0.016604<br>chr1:203460615-203460674 0.016604                                                                                                                                                                                                                                                  |         | chr1:203460415-203460474 0.041125<br>chr1:203461095-203461154 0.041125                                                                                                                |         | chr1:173793860-173793907 0.152082                                                                                                                                                                                                                                                                                                                                                                                                                                                                                                                                                                                                |         |
| Gabrg2    | Stress                | chr10:27127411-27127470 0.186921                                                                                                                                                                                                                                                             |          | chr6:158458645-158458691 0.143637                                                                                                                                                |         | chr6:158458012-158458071 0.056063<br>chr6:158458052-158458111 0.056063<br>chr6:158458412-158458471 0.001017<br>chr6:158458772-158458831 0.001017<br>chr6:158458852-158458911 0.001017<br>chr6:158458892-158458951 0.001017                                                                                              |         | chr6:158457932-158457991 0.161943<br>chr6:158458892-158458951 0.084601                                                                                                                |         | chr5:161493755-161493814 0.034243<br>chr5:161494278-161494337 0.034243                                                                                                                                                                                                                                                                                                                                                                                                                                                                                                                                                           |         |
|           | Control               | chr10:27130458-27130517 0.140810<br>chr10:27130465-27130524 0.140810<br>chr10:27130768-27130827 0.140810<br>chr10:27130966-27131025 0.140810<br>chr10:27131178-27131237 0.140810<br>chr10:27131397-27131456 0.140810<br>chr10:27104323-27104382 0.058220<br>chr10:27104987-27105046 0.164937 |          | X                                                                                                                                                                                |         | X                                                                                                                                                                                                                                                                                                                       |         | X                                                                                                                                                                                     |         | X                                                                                                                                                                                                                                                                                                                                                                                                                                                                                                                                                                                                                                |         |
| Htr4      | Stress                | X                                                                                                                                                                                                                                                                                            |          | X                                                                                                                                                                                |         | X                                                                                                                                                                                                                                                                                                                       |         | chr6:145085774-145085833 0.132238<br>chr6:145085814-145085873 0.132238<br>chr6:145085894-145085953 0.132238<br>chr6:145163181-145163240 0.124103<br>chr6:145163261-145163320 0.124103 |         | chr5:148034080-148034124 0.010424<br>chr5:148034081-148034125 0.010424<br>chr5:148034081-148034125 0.010424<br>chr5:148034443-148034495 0.010424                                                                                                                                                                                                                                                                                                                                                                                                                                                                                 |         |
|           | Control               | chr18:58416260-58416319 0.164027                                                                                                                                                                                                                                                             |          | chr6:145163771-145163827 0.149301                                                                                                                                                |         | chr6:145163981-145164040 0.100424                                                                                                                                                                                                                                                                                       |         | X                                                                                                                                                                                     |         | X                                                                                                                                                                                                                                                                                                                                                                                                                                                                                                                                                                                                                                |         |
| Lphn2     | Stress                | X                                                                                                                                                                                                                                                                                            |          | chr1:84116661-84116711 0.130892                                                                                                                                                  |         | chr1:84117017-84117076 0.077143<br>chr1:84117257-84117316 0.077143<br>chr1:84117337-84117396 0.077143<br>chr1:84117617-84117676 0.077143<br>chr1:84505713-84505772 0.179901<br>chr1:84505993-84506052 0.179901<br>chr1:84506033-84506092 0.179901<br>chr1:84506193-84506252 0.179901                                    |         | chr1:84506033-84506092 0.184338<br>chr1:84506193-84506252 0.184338<br>chr1:84742988-84743047 0.042337<br>chr1:84743548-84743607 0.042337                                              |         | chr1:81771325-81771384 0.176615                                                                                                                                                                                                                                                                                                                                                                                                                                                                                                                                                                                                  |         |
|           | Control               | chr2:247201889-247201948 0.067236<br>chr2:247268119-247268163 0.012587                                                                                                                                                                                                                       |          | X                                                                                                                                                                                |         | X                                                                                                                                                                                                                                                                                                                       |         | X                                                                                                                                                                                     |         | X                                                                                                                                                                                                                                                                                                                                                                                                                                                                                                                                                                                                                                |         |
| Slc22a2   | Stress                | X                                                                                                                                                                                                                                                                                            |          | X                                                                                                                                                                                |         | X                                                                                                                                                                                                                                                                                                                       |         | chr4:157239558-157239617 0.005790<br>chr4:157240038-157240097 0.005790<br>chr4:157240078-157240137 0.005790                                                                           |         | chr6:160699502-160699557 0.195967                                                                                                                                                                                                                                                                                                                                                                                                                                                                                                                                                                                                |         |
|           | Control               | chr1:42443429-42443481 0.008736                                                                                                                                                                                                                                                              |          | chr4:157247817-157247861 0.198596<br>chr4:157248155-157248199 0.198596                                                                                                           |         | chr4:157238718-157238777 0.024379                                                                                                                                                                                                                                                                                       |         | X                                                                                                                                                                                     |         | X                                                                                                                                                                                                                                                                                                                                                                                                                                                                                                                                                                                                                                |         |
| Tiam1     | Stress                | chr11:30218874-30218928 0.027820<br>chr11:30218705-30218752 0.027820<br>chr11:30218643-30218689 0.027820                                                                                                                                                                                     |          | X                                                                                                                                                                                |         | chr3:15243884-15243943 0.015329<br>chr3:15243964-15244023 0.015329                                                                                                                                                                                                                                                      |         | X                                                                                                                                                                                     |         | X                                                                                                                                                                                                                                                                                                                                                                                                                                                                                                                                                                                                                                |         |
|           | Control               | X                                                                                                                                                                                                                                                                                            |          | chr3:14951518-14951562 0.123568                                                                                                                                                  |         | chr3:15241884-15241943 0.064748<br>chr3:15242084-15242143 0.064748<br>chr3:15242164-15242223 0.003634<br>chr3:15242524-15242583 0.003634<br>chr3:15242564-15242623 0.003634<br>chr3:15242644-15242703 0.003634<br>chr3:15242684-15242743 0.003634<br>chr3:15242724-15242783 0.003634<br>chr3:15242764-15242823 0.003634 |         | chr3:15242844-15242903 0.037906                                                                                                                                                       |         | chr21:32932342-32932386 0.146465<br>chr21:32932167-32932211 0.146465                                                                                                                                                                                                                                                                                                                                                                                                                                                                                                                                                             |         |

In the conditions marked with X, we found no probes differentially methylated between the control and stressed groups.



**Supplementary Table 7**

**Summary of the probes associated with Ank3 and Gabrg2 which are differentially methylated between control and stressed groups.**

|               | Higher methylation in | Rat PFC | Monkey PFC (7 years old) | Monkey CD3+ (day 30 old) | Monkey CD3+ (2 years old) | Human CD34+ (cord blood)             | Monkey Whole Blood (2 years old)<br>diff meth probe      q value         | Monkey Buccal Cells (2 years old)<br>diff meth probe      q value |
|---------------|-----------------------|---------|--------------------------|--------------------------|---------------------------|--------------------------------------|--------------------------------------------------------------------------|-------------------------------------------------------------------|
| <b>Ank3</b>   | Stress                | ✓       | ✓                        | ✓                        | ✓                         | ✓                                    | chr9:77074944-77075003    0.038705<br>chr9:77074984-77075043    0.038705 | chr9:76897139-76897198    0.158048                                |
|               | Control               | ✓       | X                        | X                        | X                         | ✓                                    | X                                                                        | X                                                                 |
| <b>Gabrg2</b> | Stress                | ✓       | ✓                        | ✓                        | ✓                         | ✓                                    | X                                                                        | X                                                                 |
|               | Control               | ✓       | X                        | X                        | X                         | X                                    | chr6:158457292-158457351    0.001338                                     | chr6:158457612-158457671    0.044732                              |
|               |                       |         |                          |                          |                           |                                      | chr6:158457372-158457431    0.001338                                     | chr6:158457772-158457831    0.094282                              |
|               |                       |         |                          |                          |                           |                                      | chr6:158457852-158457911    0.001338                                     | chr6:158458332-158458391    0.102620                              |
|               |                       |         |                          |                          |                           |                                      | chr6:158458092-158458151    0.001338                                     | chr6:158458372-158458431    0.102620                              |
|               |                       |         |                          |                          |                           | chr6:158458132-158458191    0.001338 |                                                                          |                                                                   |

In the conditions marked with X, we found no probes differentially methylated between the control and stressed groups, while in the conditions marked with ✓ we found probes differentially methylated between the control and stressed groups.

**Supplementary Table 8**

**List of the p values and effect size estimates ('differential') associated with probes, mapping Ank3, which were more methylated in the stressed group compared to the controls.**

| Samples                           | diff meth probe         | p value | differential (log2) |
|-----------------------------------|-------------------------|---------|---------------------|
| Rat PFC (postnatal day 62)        | chr20:19580638-19580697 | 0.049   | 0.913               |
| Monkey PFC (7 years old)          | chr9:76713019-76713067  | 0.014   | 1.360               |
|                                   | chr9:76713128-76713178  | 0.011   | 1.160               |
|                                   | chr9:76713244-76713294  | 0.037   | 1.090               |
|                                   | chr9:76713473-76713532  | 0.024   | 1.590               |
| Monkey CD3+ (day 30 old)          | chr9:76897059-76897118  | 0.010   | 0.966               |
|                                   | chr9:76897099-76897158  | 0.017   | 1.038               |
|                                   | chr9:76897139-76897198  | 0.009   | 1.072               |
|                                   | chr9:76897179-76897238  | 0.043   | 0.827               |
|                                   | chr9:76897299-76897358  | 0.024   | 0.871               |
|                                   | chr9:76897379-76897438  | 0.034   | 0.768               |
|                                   | chr9:77144454-77144513  | 0.012   | 0.926               |
|                                   | chr9:77144854-77144913  | 0.039   | 1.085               |
| Monkey CD3+ (2 years old)         | chr9:77144934-77144993  | 0.022   | 0.948               |
|                                   | chr9:76897219-76897278  | 0.040   | 0.551               |
|                                   | chr9:76897299-76897358  | 0.022   | 0.846               |
|                                   | chr9:76899099-76899158  | 0.047   | 0.562               |
| Human CD34+ (cord blood)          | chr9:76899139-76899198  | 0.046   | 0.615               |
|                                   | chr10:61900618-61900677 | 0.007   | 0.519               |
| Monkey Whole Blood (2 years old)  | chr10:61901941-61902000 | 0.026   | 0.894               |
|                                   | chr9:77074944-77075003  | 0.027   | 0.552               |
| Monkey Buccal Cells (2 years old) | chr9:77074984-77075043  | 0.038   | 1.482               |
|                                   | chr9:76897139-76897198  | 0.007   | 1.651               |
